# Supplementary material
Source: Springer Nature journal article supplement (https://www.springermedizin.de/resource/supplementary/12879_2003_65_MOESM5_ESM.pdf/9448082)

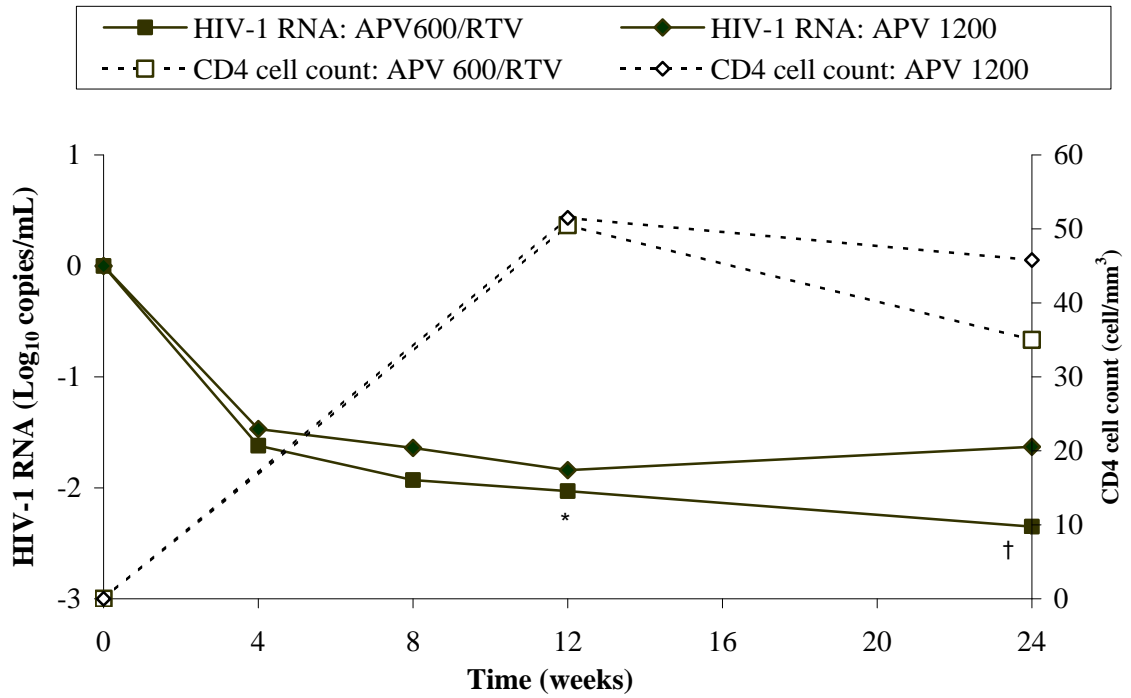

HIV-1 RNA

|             |       |     |     |     |     |
|-------------|-------|-----|-----|-----|-----|
| APV 600/RTV | n=158 | 140 | 125 | 131 | 118 |
| APV 1200    | n= 53 | 48  | 43  | 41  | 38  |

CD4

|             |       |     |     |
|-------------|-------|-----|-----|
| APV 600/RTV | n=158 | 125 | 115 |
| APV 1200    | n= 53 | 41  | 36  |

\*p=0.028

†p=0.028

Supplement: MOESM5 [file 9448082]
